# Supplementary material for: Catalytic-dependent and -independent roles of TET3 in the regulation of specific genetic programs during neuroectoderm specification
Source: PubMed Central journal article supplement (PMC10997653; doi:10.1038/s42003-024-06120-w), 2024-04-05
Supplement: 42003_2024_6120_MOESM1_ESM.pdf [file 42003_2024_6120_MOESM1_ESM.pdf]

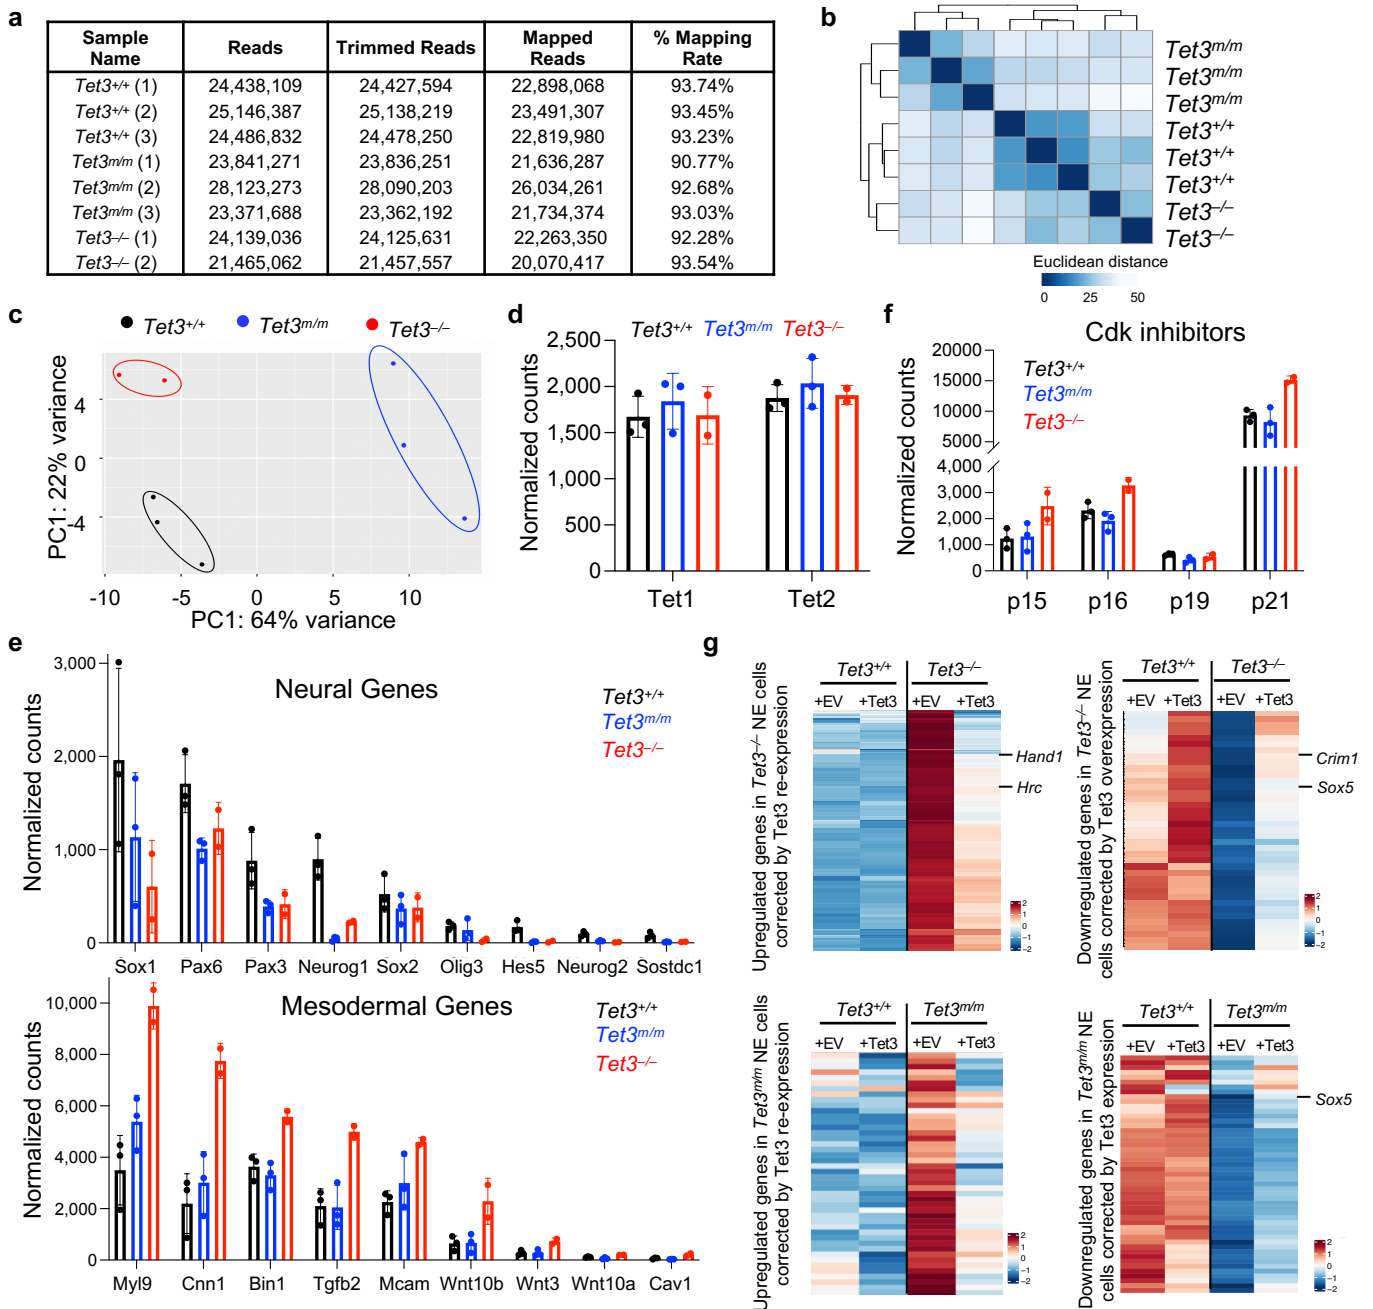

## Supplementary Figure 1: RNA-seq analysis of *Tet3<sup>m/m</sup>* and *Tet3<sup>-/-</sup>* neuroectoderm cells

- Summary of total, trimmed and mapped reads, and mapping rate per sample.
- Sample distribution plot showing that samples of the same genotype cluster together.
- Principle component analysis (PCA) of RNA-seq data showing that samples of the same genotype cluster together.
- RNA-seq normalized counts of *Tet1* and *Tet2*. Note, neither *Tet1* nor *Tet2* are deregulated. Error bars represent standard deviation.
- Plot of RNA-seq normalized counts of selected neural (top) and mesodermal (bottom) genes. Neural genes are downregulated in both *Tet3<sup>m/m</sup>* and *Tet3<sup>-/-</sup>* cell lines while mesodermal genes are uniquely upregulated in *Tet3<sup>-/-</sup>* cells. Error bars represent standard deviation.
- Plot of RNA-seq normalized counts of cyclin dependent kinase inhibitor (Cdkn) genes. Note *p15*, *p16*, and *p21* are uniquely upregulated in *Tet3<sup>-/-</sup>* cells. Error bars represent standard deviation.
- Heatmap of up and downregulated genes in *Tet3<sup>m/m</sup>* and *Tet3<sup>-/-</sup>* cells that are ameliorated by re-expression of TET3 catalytic domain. Empty vector (EV) is used as control.

a

| Sample Name               | Reads       | Trimmed Reads | Mapped Reads | % Mapping Rate | After Deduplicate | % Duplicate |
|---------------------------|-------------|---------------|--------------|----------------|-------------------|-------------|
| <i>Tet3<sup>+/+</sup></i> | 514,498,240 | 514,497,215   | 378646820    | 73.60%         | 341,578,304       | 9.79%       |
| <i>Tet3<sup>m/m</sup></i> | 540,538,184 | 540,537,178   | 394296833    | 72.95%         | 355,789,910       | 9.77%       |
| <i>Tet3<sup>-/-</sup></i> | 473,848,041 | 473,847,181   | 334638862    | 70.62%         | 303,987,670       | 9.16%       |

b

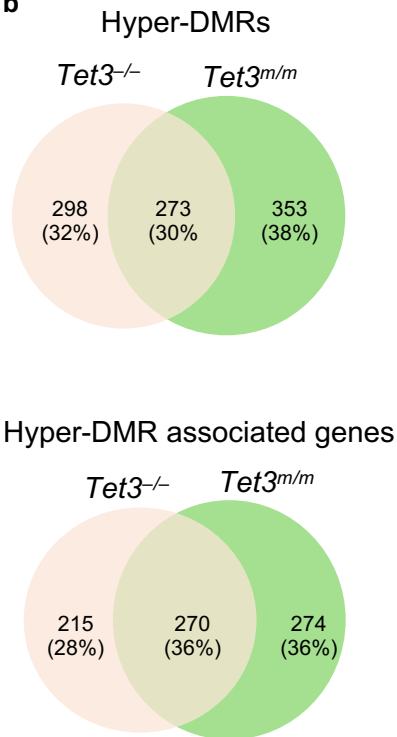

c

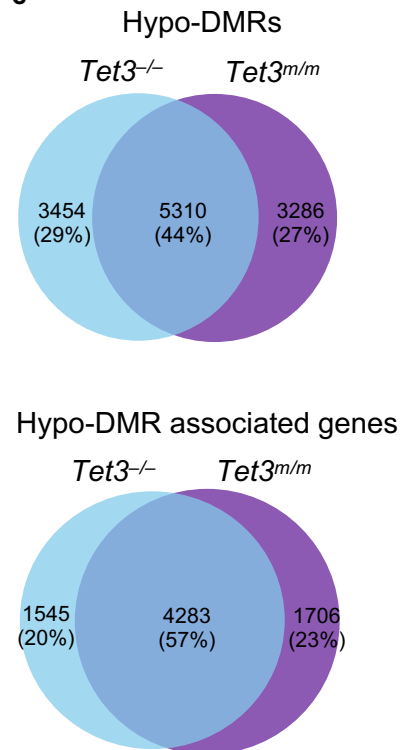

**Supplementary Figure 2: Genome wide mapping of DNA methylation in *Tet3<sup>m/m</sup>* and *Tet3<sup>-/-</sup>* neuroectoderm cells by WGBS.**

- Summary of total, trimmed and mapped reads, mapping rate, and duplication per sample.
- Overlap of hyper-DMRs (top) and hyper-DMR-associated genes (bottom) identified using methpipe.
- Overlap of hypo-DMRs(top) and hypo-DMR-associated genes (bottom).

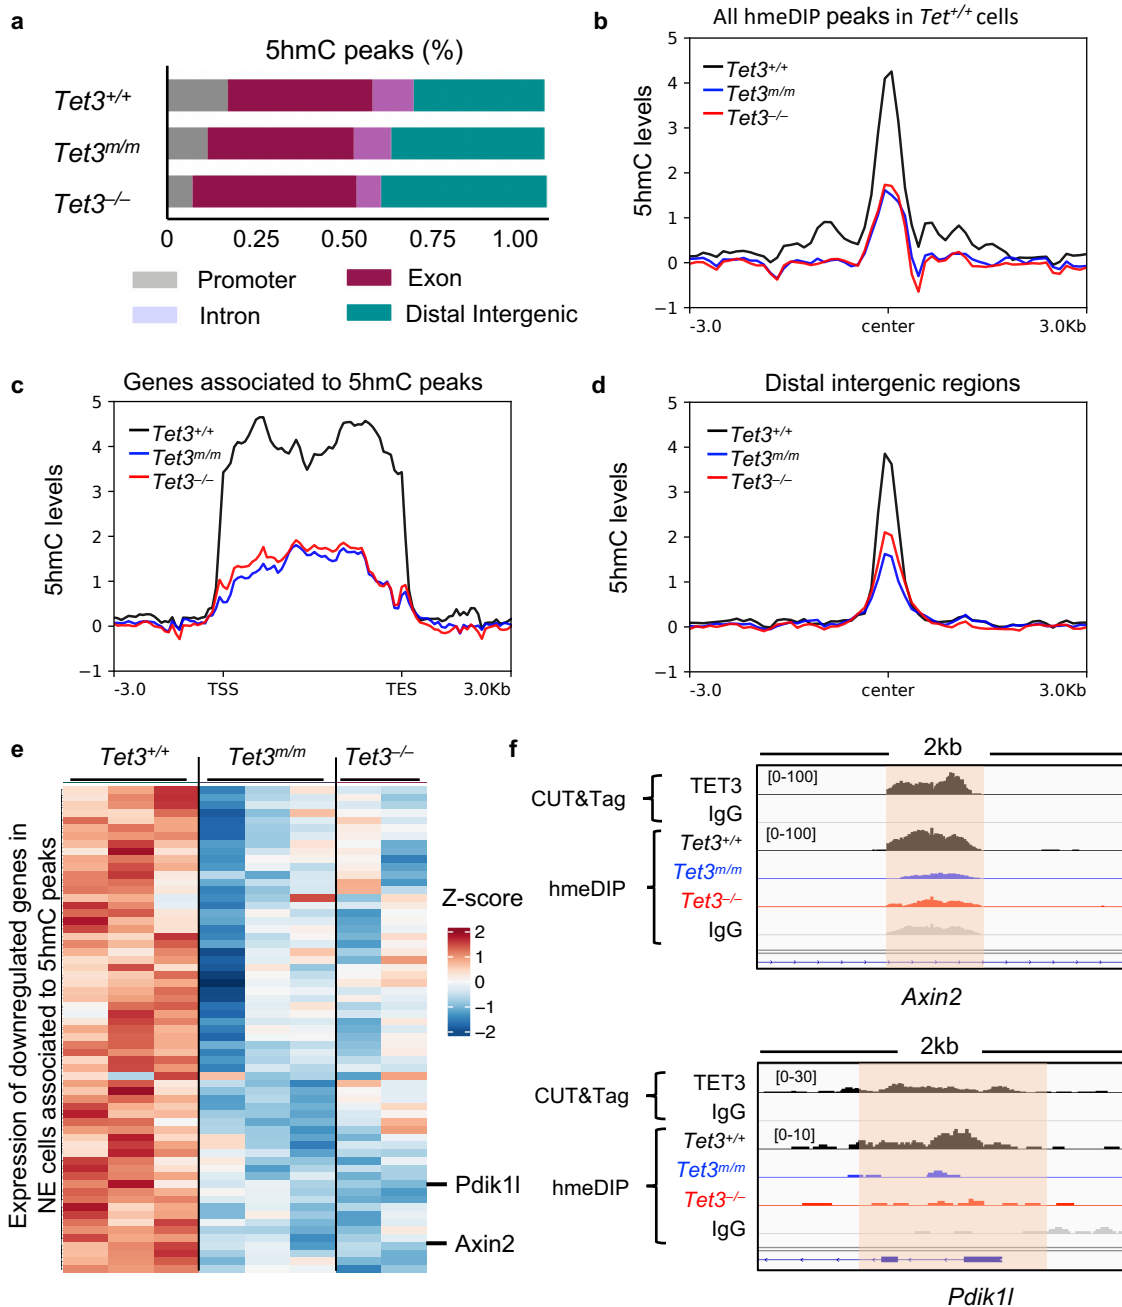

### Supplementary Figure 3: Analysis 5hmC by hmeDIP in *Tet3<sup>+/+</sup>*, *Tet3<sup>m/m</sup>* and *Tet3<sup>-/-</sup>* NE cells

- Genomic distribution of 5hmC peaks in *Tet3<sup>+/+</sup>*, *Tet3<sup>m/m</sup>* and *Tet3<sup>-/-</sup>* cells.
- 5hmC levels at all hmeDIP peaks in *Tet3<sup>+/+</sup>* cells. Note that 5hmC levels at these peaks are reduced in *Tet3<sup>m/m</sup>* and *Tet3<sup>-/-</sup>* cells.
- 5hmC levels across transcription start site (TSS) to transcription end site (TES) of genes.
- 5hmC levels across distal intergenic regions.
- Heatmap of genes associated to 5hmC peaks in wild type NE cell. Note that these genes are downregulated in *Tet3<sup>m/m</sup>* and *Tet3<sup>-/-</sup>* cells.
- Genome browser tracks showing 5hmC levels at TET3-enriched regions at representative loci.

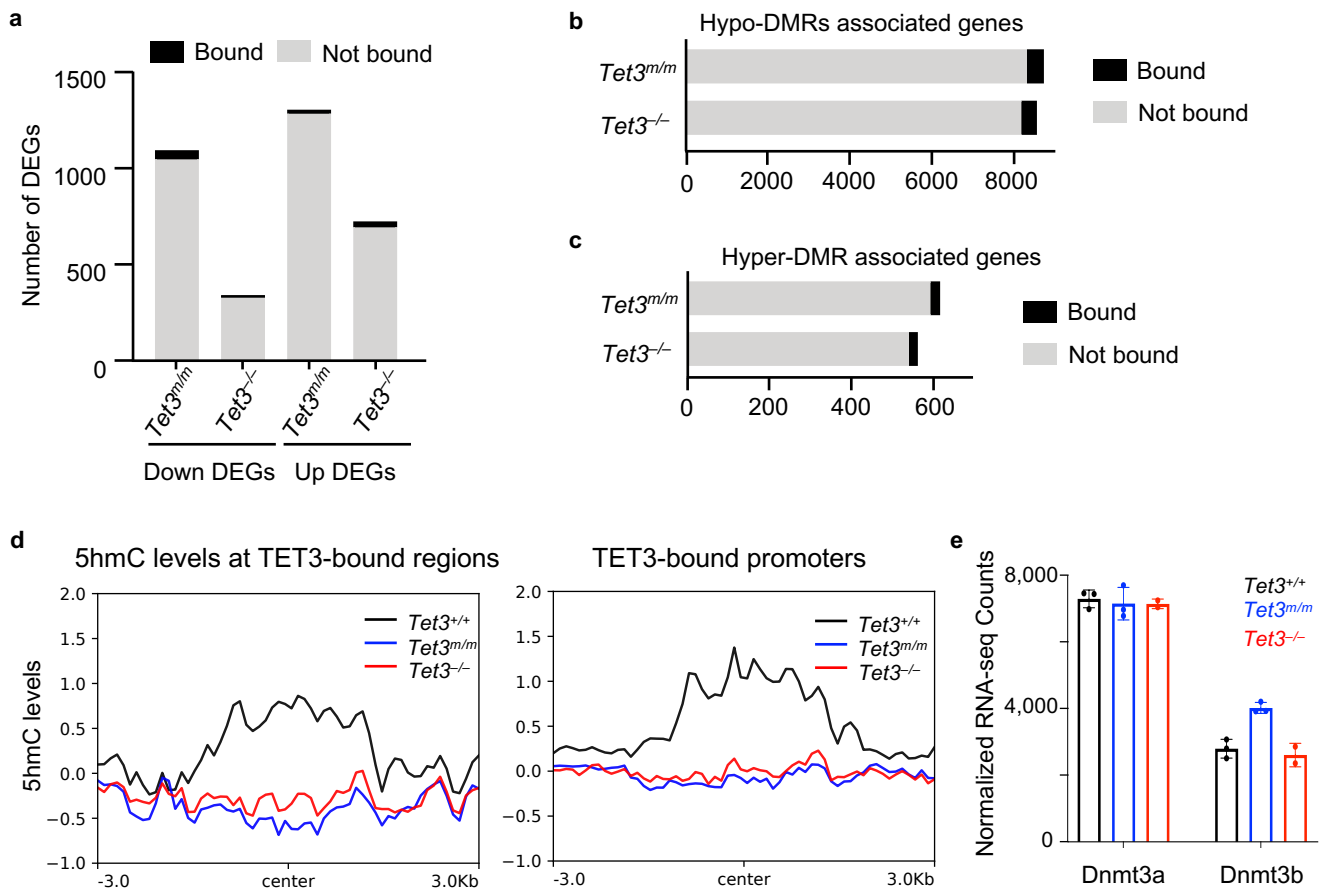

**Supplementary Figure 4: Summary of TET3 CUT&Tag in *Tet3<sup>+/+</sup>* neuroectoderm cells**

- Number of DEGs bound by TET3.
- Number of hypo-DMR associated genes bound by TET3.
- Number of hyper-DMR associated genes bound by TET3.
- 5hmC levels at all TET3 bound regions (left) and at TET3 bound promoters (right).
- RNA-seq normalized counts of *Dnmt3a* and *Dnmt3b* in NE cells. Count numbers are not significant between genotypes based on DESeq2. Error bars represent standard deviation.

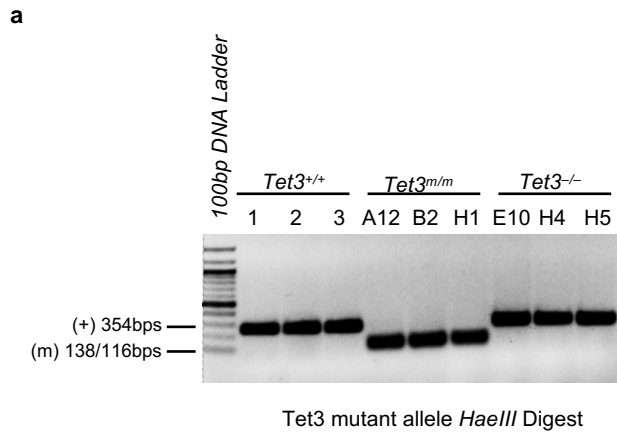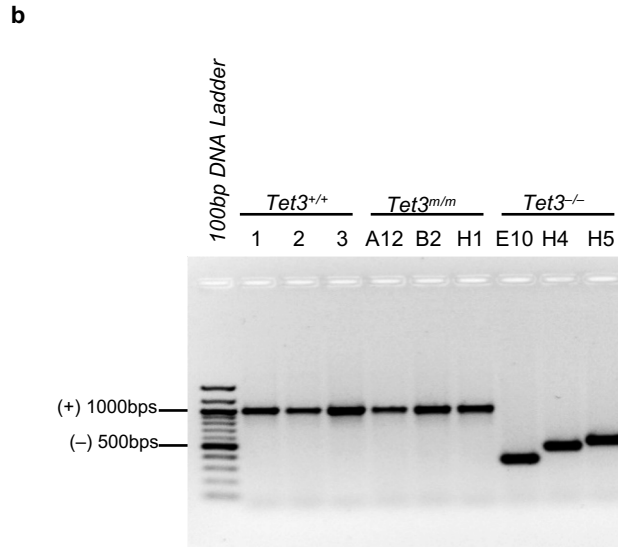

**Supplementary Figure 5: Uncropped images of gels shown in Fig. 1b**

- a. Genotyping of *Tet3* mutant cells by RFLP with *HaeIII*.
- b. Genotyping of *Tet3* knockout cells by PCR with primers flanking exon 4.

**Supplementary Table 1: List of oligonucleotides used in this study**

| Name                          | Sequence                                                                                                                                 | Purpose                                                                | Source        |
|-------------------------------|------------------------------------------------------------------------------------------------------------------------------------------|------------------------------------------------------------------------|---------------|
| Tet3 Mut exon 9 gRNA For      | CCTAAATGTTCTCATCCTGG                                                                                                                     | Mutating Tet3 exon 9                                                   | This paper    |
| Tet3 Mut exon 9 gRNA Rev      | CCAGGATGAGAACATTTAGG                                                                                                                     | Mutating Tet3 exon 9                                                   | This paper    |
| Tet3 Mut gene block sequence  | 5'agctatcgGAATTCTGT...500bp....CATGGACTTCTGT<br>GCCACAGCCT <b>TCAAGGCC</b> CAACATAACCTCTACAA<br>TGGGTGCACTGTGGTA...410bp.....Ctcgatcgt3' | Introducing HKD to YKA mutation the catalytic pocket of Tet3 in exon 9 | This paper    |
| Tet3 Mut Genotyping For       | ATTCACACAGGTGACCAATGAG                                                                                                                   | Genotyping Tet3 Mut allele                                             | This paper    |
| Tet3 Mut Genotyping Rev       | CCTAGGTAGTGTGGCTTAGAT                                                                                                                    | Genotyping Tet3 Mut allele                                             | This paper    |
| Tet3 KO exon 4 left gRNA For  | TCCTAAATGTTCTCATCTGG                                                                                                                     | Deletion of Tet3 Exon 4                                                | This paper    |
| Tet3 KO exon 4 left gRNA Rev  | CCAGATGAGAACATTTAGGA                                                                                                                     | Deletion of Tet3 Exon 4                                                | This paper    |
| Tet3 KO exon 4 right gRNA For | TTCCACAGCCTGGTTTTCT                                                                                                                      | Deletion of Tet3 Exon 4                                                | This paper    |
| Tet3 KO exon 4 right gRNA Rev | AGAAAACCAGGCTGTGGGAA                                                                                                                     | Deletion of Tet3 Exon 4                                                | This paper    |
| Tet3 KO Genotyping For        | CTTAAGCAAAGCTCCCATGC                                                                                                                     | Genotyping Tet3 KO allele                                              | This paper    |
| Tet3 KO Genotyping Rev        | GACTCTGGGTATTTGGGGT                                                                                                                      | Genotyping Tet3 KO allele                                              | This paper    |
| Tet3 exon 3 RTqPCR For        | CCGTGACTGTGCTCTCAACT                                                                                                                     | Real time qPCR                                                         | Reference #15 |
| Tet3 exon 4 RTqPCR Rev        | CCATGAGTTCCCGGATAGAA                                                                                                                     | Real time qPCR                                                         | Reference #15 |
| Tet2 exon 3 RTqPCR For        | CAAGCAACCAAAAGCACAGA                                                                                                                     | Real time qPCR                                                         | Reference #14 |
| Tet2 exon 4 RTqPCR Rev        | GGACCAGCTCCTAGATGGGTA                                                                                                                    | Real time qPCR                                                         | Reference #14 |
| Tet1 RTqPCR For               | TGCACCTACTGCAAGAATCG                                                                                                                     | Real time qPCR                                                         | Reference #13 |
| Tet1 RTqPCR Rev               | AAATTGGCATCACAGCTTCC                                                                                                                     | Real time qPCR                                                         | Reference #13 |
| Dnmt1 RTqPCR For              | GCTACCAGTGCACCTTTGGT                                                                                                                     | Real time qPCR                                                         | Reference #46 |
| Dnmt1 RTqPCR Rev              | CAGAGGCAGCTTTTCTCCTG                                                                                                                     | Real time qPCR                                                         | Reference #46 |
| Gapdh RTqPCR For              | ACATCTCACTCAAGATTGTCAGCA                                                                                                                 | Real time qPCR                                                         | Reference #10 |
| Gapdh RTqPCR Rev              | ATGGCATGGACTGTGGTCAT                                                                                                                     | Real time qPCR                                                         | Reference #10 |

## Supplementary Table 2: List of reagents and resources used in this study

| Reagent/Resource                      | Source                | Identifier                                                                                                                                          |
|---------------------------------------|-----------------------|-----------------------------------------------------------------------------------------------------------------------------------------------------|
| <b>Antibodies</b>                     |                       |                                                                                                                                                     |
| Anti-Tet3                             | Millipore             | ABE290                                                                                                                                              |
| Rabbit IgG isotype control DA1E       | CST                   | 3900                                                                                                                                                |
| Guinea pig anti-rabbit                | Antibodies Online     | ABIN101961                                                                                                                                          |
| <b>Kits</b>                           |                       |                                                                                                                                                     |
| Qiagen RNeasy Mini kit                | Qiagen                | 74104                                                                                                                                               |
| Quick-DNA miniprep kit                | Zymo                  | D3024                                                                                                                                               |
| Superscript IV first strand           | Invitrogen            | 18091050                                                                                                                                            |
| XtremeGene 9 DNA transfection reagent | Roche                 | 06365787001                                                                                                                                         |
| Click-It 647 EdU                      | Thermo Fisher         | C10424                                                                                                                                              |
| MinElute PCR Purification Kit         | Qiagen                | 28004                                                                                                                                               |
| hmeDIP kit                            | Active Motif          | 55010                                                                                                                                               |
| <b>Primers/Oligos</b>                 |                       |                                                                                                                                                     |
| RT-qPCR primers                       | Table S1              | N.A.                                                                                                                                                |
| Genotyping Primers                    | Table S1              | N.A.                                                                                                                                                |
| gRNAs for gene targeting              | Table S1              | N.A.                                                                                                                                                |
| <b>Plasmids</b>                       |                       |                                                                                                                                                     |
| Topo pcr2.1 Tet3 mutant donor vector  | This paper            | N.A.                                                                                                                                                |
| pX330-Tet3-gRNA                       | This paper            | N.A.                                                                                                                                                |
| pCAG-Myc-IRESblast                    | From Taiping Chen Lab | N.A.                                                                                                                                                |
| pCAG-Myc-Dnm1-IRESblast               | From Taiping Chen Lab | N.A.                                                                                                                                                |
| FUW-HA-2A-TdTomato                    | Reference #46         | N.A.                                                                                                                                                |
| FUW-HA-Tet3CD-2A-TdTomato             | This Paper            | N.A.                                                                                                                                                |
| <b>Software</b>                       |                       |                                                                                                                                                     |
| Trim galore v0.6.7                    | Babraham Institute    | <a href="https://www.bioinformatics.babraham.ac.uk/projects/trim_galore/">https://www.bioinformatics.babraham.ac.uk/projects/trim_galore/</a>       |
| STAR v2.7.9a                          | Reference #48         | <a href="https://github.com/alexdobin/STAR">https://github.com/alexdobin/STAR</a>                                                                   |
| DESeq2 v1.40.2                        | Reference #49         | <a href="http://www.bioconductor.org/packages/release/bioc/html/DESeq2.html">http://www.bioconductor.org/packages/release/bioc/html/DESeq2.html</a> |
| DAVID 6.8                             | Reference #50         | <a href="https://david.ncicrf.gov">https://david.ncicrf.gov</a>                                                                                     |
| Bismark v0.23.1                       | Reference #51         | <a href="https://github.com/FelixKrueger/Bismark">https://github.com/FelixKrueger/Bismark</a>                                                       |
| Methpipe v5.0.1                       | Reference #52         | <a href="http://smithlabresearch.org/software/methpipe/">http://smithlabresearch.org/software/methpipe/</a>                                         |
| ChIPseeker v1.36.0                    | Github                | <a href="https://guangchuangyu.github.io/software/ChIPseeker/">https://guangchuangyu.github.io/software/ChIPseeker/</a>                             |
| Bedtools v2.30.0                      | Reference #54         | <a href="https://bedtools.readthedocs.io/en/latest/">https://bedtools.readthedocs.io/en/latest/</a>                                                 |
| deepTools v3.5.1                      | Reference #53         | <a href="https://deeptools.readthedocs.io/en/develop/index.html">https://deeptools.readthedocs.io/en/develop/index.html</a>                         |
| Bowtie2 v2.4.5                        | Reference #55         | <a href="http://bowtie-bio.sourceforge.net/bowtie2/index.shtml">http://bowtie-bio.sourceforge.net/bowtie2/index.shtml</a>                           |
| Integrative Genomics Viewer v2.14.1   | Broad Institute       | <a href="http://software.broadinstitute.org/software/igv/">http://software.broadinstitute.org/software/igv/</a>                                     |
| MACS v2.2.7.1                         | Reference #56         | <a href="https://github.com/macs3-project/MACS">https://github.com/macs3-project/MACS</a>                                                           |
| GraphPad Prism 8 v8.4.2               | GraphPad              | <a href="https://www.graphpad.com/">https://www.graphpad.com/</a>                                                                                   |
