# Supplementary material for: Catalytic-dependent and -independent roles of TET3 in the regulation of specific genetic programs during neuroectoderm specification
Source: PubMed Central journal article supplement (PMC10997653; doi:10.1038/s42003-024-06120-w), 2024-04-05
Supplement: 42003_2024_6120_MOESM2_ESM.pdf [file 42003_2024_6120_MOESM2_ESM.pdf]

## **Description of Additional Supplementary Files**

**File name:** Supplementary Data 1

**Description:** The source data behind the graphs and heatmaps in the paper.
